# Supplementary material for: The Temporal and Spatial Epidemiology Employed in the Elimination of the HIV Epidemic in the Largest Capital of the Brazilian Rainforest
Source: MDPI journal article supplement (doi:10.3390/tropicalmed7090225), 2022-09-02
Supplement: s1 [file s1]

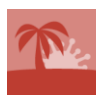

Article

# The Temporal and Spatial Epidemiology Employed in the Elimination of the HIV Epidemic in the Largest Capital of the Brazilian Rainforest

Bruna Rafaela Leite Dias <sup>1,\*</sup>, Taymara Barbosa Rodrigues <sup>1</sup>, Dulce Gomes <sup>2</sup>, Ricardo Alexandre Arcêncio <sup>3</sup>, Elucir Gir <sup>4</sup>, Glenda Roberta Oliveira Naiff Ferreira <sup>1</sup>, Sandra Helena Isse Polaro <sup>1</sup>, Eliã Pinheiro Botelho <sup>1</sup>

<sup>1</sup> Graduate Nursing Program; Federal University of Pará, Belém 66075-110, Brazil

<sup>2</sup> Department of Mathematics, Luís António Verney College, University of Évora, 7000-671 Évora, Portugal

<sup>3</sup> Department of Maternal-Infant and Public Health Nursing, College of Nursing at Ribeirão Preto, University of São Paulo, 14040-902 Ribeirão Preto, Brazil

<sup>4</sup> College of Nursing at Ribeirão Preto, University of São Paulo, 14040-902 Ribeirão Preto, Brazil

\* Correspondence: brunarafaella\_jm@hotmail.com

**Table S1.** Epidemiological profile of new reported cases of HIV/AIDS. Belém/Pará, Brazil (2007 - 2018).

| Variables                             | n    | %    |
|---------------------------------------|------|------|
| <b>Age (Years)</b>                    |      |      |
| 11-14                                 | 14   | 0,2  |
| 15-29                                 | 2184 | 36,3 |
| 30-49                                 | 3059 | 50,9 |
| 50+                                   | 750  | 12,5 |
| <b>Sex</b>                            |      |      |
| Female                                | 1760 | 29,3 |
| Male                                  | 4245 | 70,7 |
| Unanswered                            | 2    | 0,0  |
| <b>Race/skin color</b>                |      |      |
| Black                                 | 417  | 6,9  |
| Brown                                 | 4180 | 69,6 |
| Indigenous                            | 13   | 0,2  |
| White                                 | 686  | 11,4 |
| Yellow                                | 20   | 0,3  |
| Unanswered                            | 691  | 11,5 |
| <b>Schooling</b>                      |      |      |
| Elementary School                     | 1763 | 29,3 |
| High School                           | 1936 | 32,2 |
| Higher Education                      | 796  | 13,3 |
| Illiterate                            | 37   | 0,6  |
| Unanswered                            | 1475 | 24,6 |
| <b>Exposure category</b>              |      |      |
| Female/Bisexual/Haemophilic           | 0    | 0,0  |
| Female/Bisexual/Intravenous drug user | 1    | 0,02 |

---

|                                     |      |      |
|-------------------------------------|------|------|
| Female/Bisexual                     | 16   | 0,26 |
| Haemophilic                         | 1    | 0,0  |
| Heterosexual                        | 3149 | 52,4 |
| Heterosexual/Haemophilic            | 2    | 0,0  |
| Heterosexual/Intravenous drug user  | 90   | 1,5  |
| Homosexual                          | 1721 | 28,6 |
| Homosexual/Haemophilic              | 1    | 0,0  |
| Homosexual/Intravenous drug user    | 19   | 0,3  |
| Intravenous drug user               | 17   | 0,3  |
| Male/Bisexual/Haemophilic           | 1    | 0,0  |
| Male/Bisexual/Intravenous drug user | 5    | 0,08 |
| Male/Bisexual                       | 408  | 6,83 |
| Vertical transmission               | 62   | 1,0  |
| Unanswered                          | 514  | 8,6  |

---
