# Supplementary material for: The Temporal and Spatial Epidemiology Employed in the Elimination of the HIV Epidemic in the Largest Capital of the Brazilian Rainforest
Source: MDPI journal article supplement (doi:10.3390/tropicalmed7090225), 2022-09-02
Supplement: s1 [file s1]

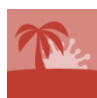

Article

# The Temporal and Spatial Epidemiology Employed in the Elimination of the HIV Epidemic in the Largest Capital of the Brazilian Rainforest

Bruna Rafaela Leite Dias <sup>1,\*</sup>, Taymara Barbosa Rodrigues <sup>1</sup>, Dulce Gomes <sup>2</sup>, Ricardo Alexandre Arcêncio <sup>3</sup>, Elucir Gir <sup>4</sup>, Glenda Roberta Oliveira Naiff Ferreira <sup>1</sup>, Sandra Helena Isse Polaro <sup>1</sup>, Eliã Pinheiro Botelho <sup>1</sup>

<sup>1</sup> Graduate Nursing Program; Federal University of Pará, Belém 66075-110, Brazil

<sup>2</sup> Department of Mathematics, Luís António Verney College, University of Évora, 7000-671 Évora, Portugal

<sup>3</sup> Department of Maternal-Infant and Public Health Nursing, College of Nursing at Ribeirão Preto, University of São Paulo, 14040-902 Ribeirão Preto, Brazil

<sup>4</sup> College of Nursing at Ribeirão Preto, University of São Paulo, 14040-902 Ribeirão Preto, Brazil

\* Correspondence: brunarafaella\_jm@hotmail.com

**Table S2.** Analysis of correlation between socioeconomic indicators and HIV/AIDS incidence rate. Belém/Pará, Brazil (2007-2018).

| Variable                                                                   | Collinearity | p-value |
|----------------------------------------------------------------------------|--------------|---------|
| % of population living with more than 2 people in the house                | 0.002        | 0,978   |
| % of population living in houses with tap water                            | 0.224        | 0.006   |
| % of population living in house with bathroom and tap water                | 0.080        | 0.331   |
| % of population living in urban households with garbage collection service | 0.046        | 0,572   |
| % of population living in houses having electric power                     | 0.061        | 0,456   |
| % of people in houses having inadequate water supply and sewage disposal   | -0.076       | 0,351   |
| % of people living in homes with walls other than masonry or wood shavings | -0.077       | 0,347   |
| 18 years old and over people illiteracy rate                               | -0.043       | 0,597   |
| % 18 years and over people with complete elementary schooling level        | 0.032        | 0,695   |
| % of 25 years old and over people with complete elementary schooling level | 0.032        | 0,697   |
| % 18 years old and over people with complete high schooling level          | 0.022        | 0,787   |
| % of 25 years old and over people with complete university schooling level | -0.054       | 0,509   |

---

|                                                                                                                 |        |       |
|-----------------------------------------------------------------------------------------------------------------|--------|-------|
| % of employed people with elementary schooling                                                                  | 0.057  | 0,487 |
| % of employed people with high schooling                                                                        | 0.035  | 0,666 |
| % of employed people with university schooling                                                                  | -0.048 | 0,559 |
| IDHM                                                                                                            | 0.019  | 0,821 |
| Gini Index                                                                                                      | 0.127  | 0,119 |
| Theil Index – L                                                                                                 | 0.099  | 0,226 |
| IVS                                                                                                             | -0.033 | 0,690 |
| Family Health Strategy Coverage                                                                                 | 0.527  | 0,000 |
| % of extremely poor people                                                                                      | -0.080 | 0,390 |
| % of poor people                                                                                                | -0.059 | 0,469 |
| % of people vulnerable to poverty                                                                               | -0.039 | 0,631 |
| % of total rental income appropriated by the 10% of the population with the highest per capita household income | 0.173  | 0,033 |
| % of total rental income appropriated by the 20% of the population with lowest per capita household             | -0.041 | 0,619 |
| % of total rental income appropriated by the 20% of the population with the highest per capita household income | 0.154  | 0,059 |
| Population average per capita income                                                                            | -0.081 | 0,321 |
| Average per capita household income of the quintile of the poorest population                                   | -0.088 | 0,281 |
| Average per capita household income of the second quintile of the poorest population                            | -0.095 | 0,246 |
| Average per capita household income of the third quintile of the poorest population                             | -0.102 | 0,213 |
| Average per capita household income of the of the fourth quintile of the poorest population                     | -0.101 | 0,218 |
| Average per capita household income of the poorest population                                                   | 0.050  | 0,589 |
| Average per capita household income of poor people                                                              | 0.070  | 0,392 |
| Average per capita household income of people vulnerable to poverty                                             | 0.011  | 0,893 |
| % of 18 years old and over self-employed people                                                                 | -0.028 | 0,737 |
| % of 18 years old and over hired people                                                                         | 0.157  | 0,054 |

---

|                                                                      |        |       |
|----------------------------------------------------------------------|--------|-------|
| % of employees with household income up to 1 minimum<br>monthly wage | -0.061 | 0,455 |
| % of employees with monthly income up to 5 minimum<br>monthly wages  | 0.069  | 0,399 |
| Job activity rate for 18 years old and over people                   | -0.152 | 0,063 |

---
